# Supplementary material for: Cyclodextrin-threaded covalent organic polyrotaxanes with tunable solid-state emissive activity for efficient iodine capture
Source: Royal Society of Chemistry journal article supplement (doi:10.1039/d5ra06071k), 2025-01-01
Supplement: d5ra06071k1.pdf [file d5ra06071k1.pdf]

### *Supporting Information*

## **Cyclodextrin-Threaded Covalent Organic Polyrotaxanes with Tunable Solid-State Emissive Activity for Efficient Iodine Capture**

Xia Guo,<sup>a</sup> Xueling Zhou,<sup>a</sup> Qiupeng Gu,<sup>a</sup> Xiaohong Zhang,<sup>a</sup> Yanyan Tang<sup>b\*</sup>

*a. School of mathematics and statistics, Weifang University, Weifang, Shandong, PR China*

*b. School of school of physics and electronic infor, Weifang University, Weifang, Shandong, PR China*

\*E-mail: 736308663@qq.com (Y. Tang)

### **Contents**

#### **Section 1. Experimental Section**

#### **Section 2. Methods**

#### **Section 3. Physical characterization of TPE-COP**

#### **Section 4. TEM and EDS**

#### **Section 5. Removal of iodine from water by $\beta$ -CD.**

#### **Section 6. Fitting of Langmuir and Freundlich adsorption isotherm data**

#### **Section 7. Iodine vapor capture**

#### **Section 8. Supporting Tables**

#### **Section 9. Supporting References**

## **Section 1. Experimental Section**

### **1.1. Materials**

All reagents were purchased from commercial suppliers and used directly without further purification.

### **1.2 Synthesis**

#### **Synthesis of CD-inclusion**

The preparation was conducted according to our previous reports.[1]

## **Section 2. Methods**

### **2.1 Physical Characterization**

Fourier transform infrared spectroscopy (FT-IR, PerkinElmer, 2000 FTIR spectrometer, Cambridge, UK) was recorded at wavelengths ranging from 400 to 4000  $\text{cm}^{-1}$ . Solid-state  $^{13}\text{C}$  CP/MAS NMR were collected on Bruker SB Avance III 500 MHz spectrometer. Thermal gravimetric analysis (TGA) was recorded using NETZSCH STA 449C analyzer from 30 to 800  $^{\circ}\text{C}$  at a heating rate of 10  $^{\circ}\text{C}/\text{min}$  under the protection of  $\text{N}_2$ . Transmission electron microscope (TEM) were conducted on a FEI model Tecani 20 microscope and a JEOL model JSM-2100F. Powder X-ray diffraction (PXRD) parameters were obtained using a Rigaku-DMAX 2500 diffractometer at a rate of 5 $^{\circ}$   $\text{min}^{-1}$  from 5 $^{\circ}$  to 80 $^{\circ}$ .

### **2.2 Iodine vapor adsorption**

Small open glass vials containing 20 mg of adsorbent and sufficient amount of iodine monomers were placed in large glass vials with tightly closed milled mouths, and the whole closed vials were placed in an oven at 348.15 K and 1.0 bar, and the change in mass of the adsorbent with respect to time was recorded at regular intervals. And the amount of adsorption was calculated according to the following equation:

$$q = \frac{m_t - m_0}{m_0} \quad (\text{S1})^{[3]}$$

Where ‘q’ is the amount adsorbed at time t, ‘ $m_t$ ’ is the mass of the adsorbent at time t, and ‘ $m_0$ ’ is the mass of initial adsorbents.

### **2.3 Adsorption of iodine in water:**

The adsorption to iodine in iodine-saturated aqueous pipette solutions was recorded using a UV-Vis spectrophotometer. The iodine-saturated aqueous solution was prepared by adding 0.1 g of  $I_2$  to 50 ml of aqueous solution and sonicated for 30 min. Five milligrams of adsorbent was placed in a vial containing 5 ml of iodine saturated aqueous solution (1.14 mmol). Periodically, 2 ml of the solution was withdrawn from the mother liquor, UV-visible adsorption was recorded and then transferred back to the reaction vial.

#### **2.4 Iodine release**

Time-dependent UV-Vis measurements were performed in MeOH.

#### **2.5 Fitting of Langmuir and Freundlich adsorption isotherm**

The adsorption behavior of TPE-COP and TPE-CD-COPR towards iodine in iodine-saturated aqueous pipette solutions was recorded using a UV-Vis spectrophotometer. The iodine-saturated aqueous solution was prepared by adding 0.1 g of  $I_2$  to 50 ml of aqueous solution and sonicated for 30 min. Five milligrams of adsorbent was placed in a vial containing 5 ml of iodine saturated aqueous solution (1.14 mmol). Periodically, 2 ml of the solution was withdrawn from the mother liquor, UV-visible adsorption was recorded and then transferred back to the reaction vial.

### Section 3. Physical characterization on the TPE-COP

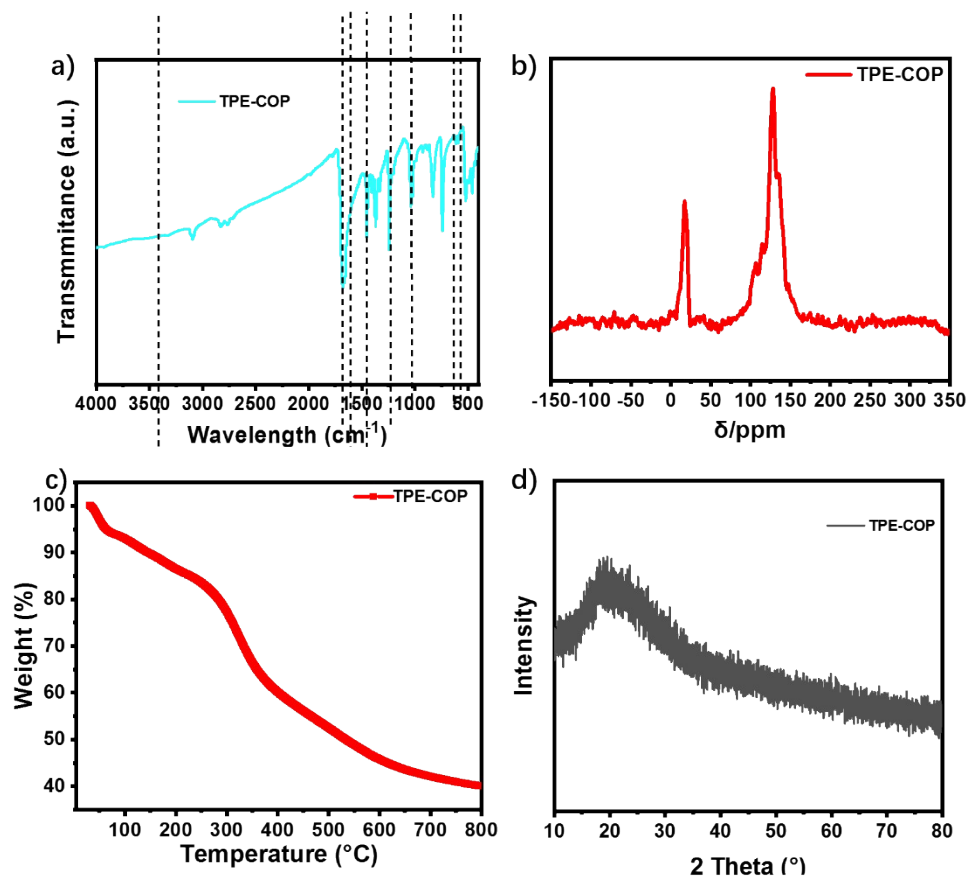

**Figure S1.** Physical characterization of TPE-COP. a) FT-IR of TPE-COP; b) solid state  $^{13}\text{C}$  NMR of TPE-COP; c) TGA of TPE-COP; d) XRD of TPE-COP.

**Figure S1.** TGA of TPE-COP.

## Section 4. TEM and EDS

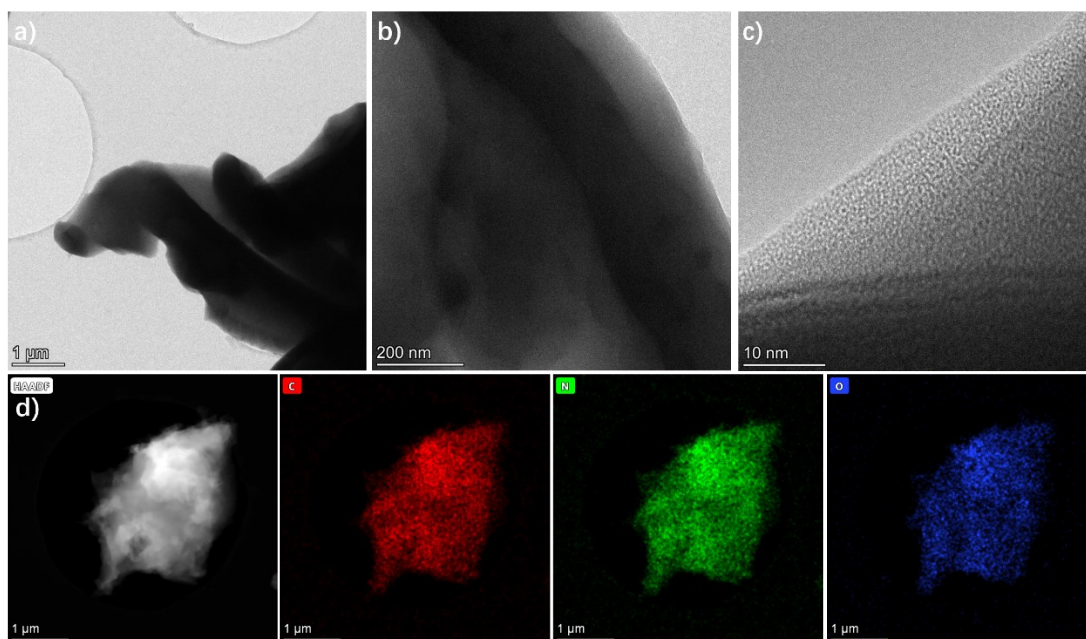

**Figure S2.** a-d) TEM of TPE-COP at the scale bar of 1000, 200 and 10 nm, respectively; d) Elemental Mapping of TPE-COPs.

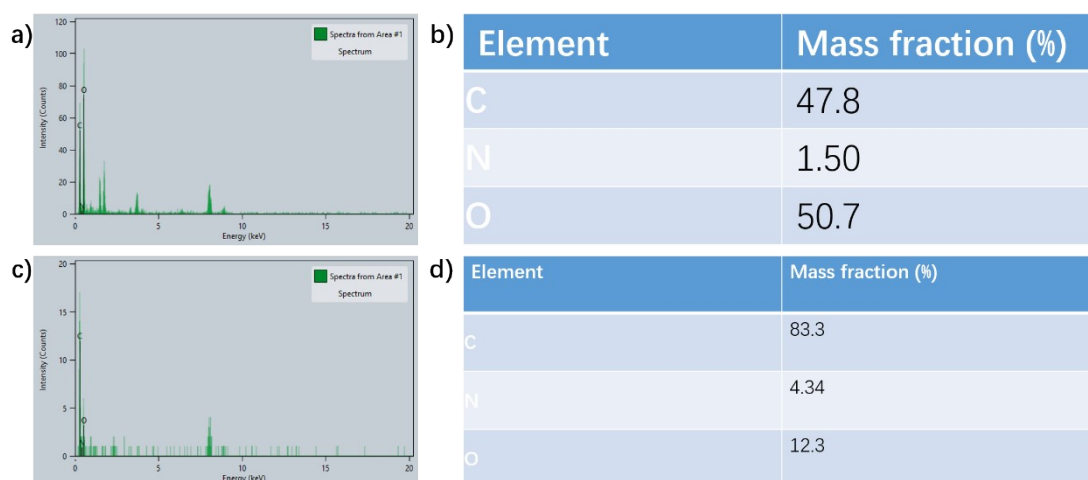

**Figure S3.** EDS and corresponding elemental contents of as-synthesized samples. a) EDS of TPE-CD-COPR; b) Element content of TPE-CD-COPR; c) EDS of TPE-COP; d) Element content of TPE-COP.

## Section 5. Removal of iodine from water by $\beta$ -CD

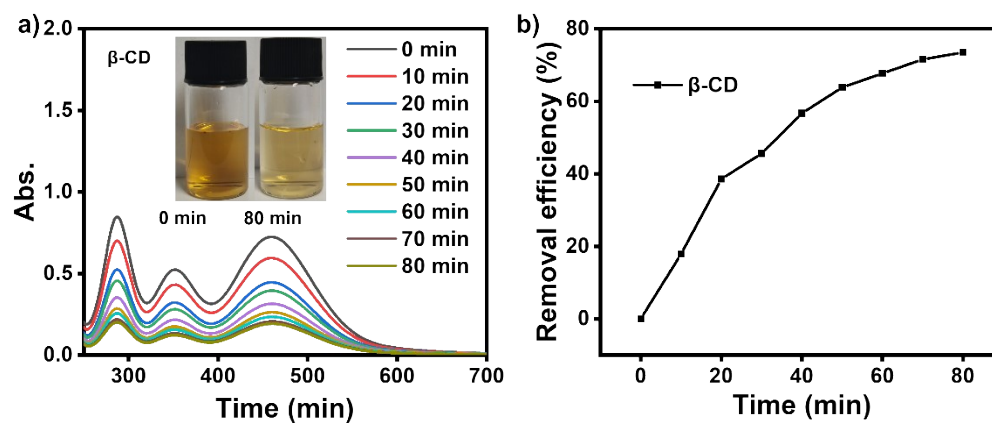

**Figure S4.** Removal of iodine from water by  $\beta$ -CD.

## Section 6. Fitting of Langmuir and Freundlich adsorption isotherm data

### data

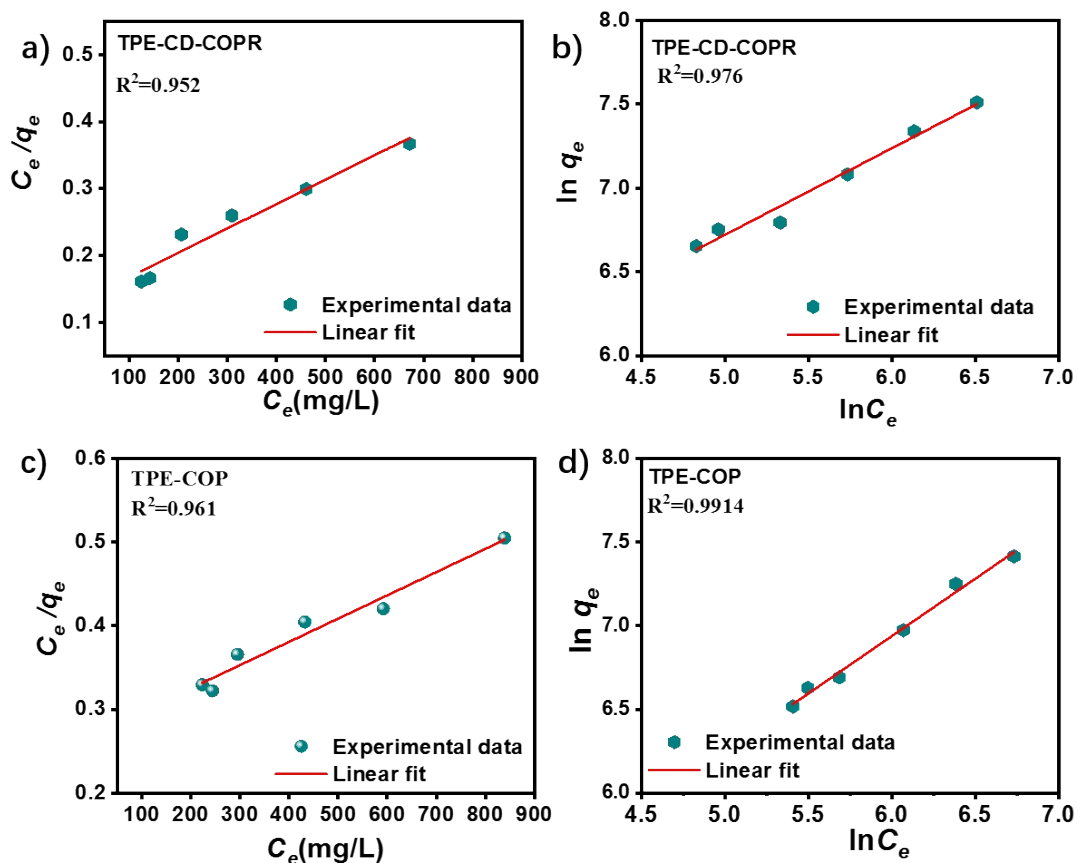

**Figure S5.** Fitting of Langmuir and Freundlich adsorption isotherm data for TPE-COP and TPE-CD-COPR in water. a) Langmuir models for TPE-COP; b) Langmuir models for TPE-CD-COP; c) Freundlich models for TPE-COP; d) Freundlich models for TPE-CD-COPR

## Section 7. Iodine vapor capture

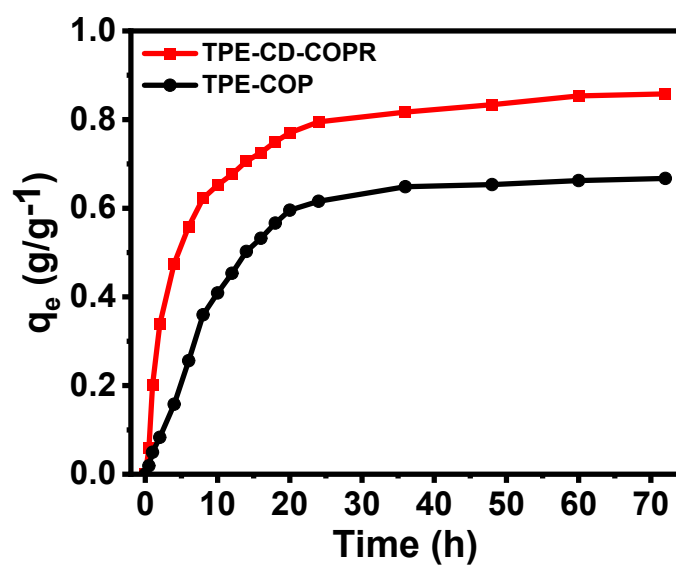

**Figure S6.** Iodine vapor capture of TPE-CD-COPR and TPE-COP.



## Section 8. Supporting Tables

**Table S1.** Comparison of the TPE-CD-COPR with other porous polymers and cyclodextrin-based adsorbents for iodine capture from water.

| Samples          | Remove rate  | Uptake<br>equilibrium<br>time | Reusability<br>after 5 times | Reference |
|------------------|--------------|-------------------------------|------------------------------|-----------|
| COPR-2           | 91%          | 80 min                        | -                            | [S1]      |
| COPR-1           | 85%          | 80 min                        | -                            | [S1]      |
| P-CDMs           | 81%          | 80 min                        | 97.0%                        | [S2]      |
| WPMC-1           | 100%         | 300 min                       | 91.7%                        | [S3]      |
| COPR-1           | 96.68±0.75 % | 90 min                        | 98.7±1.33 %,                 | [S4]      |
| iFP-POP          | 100%         | 120 min                       | 84.01%                       | [S5]      |
| FO-POP           | 91.28%       | 140 min                       | 73.80%                       | [S5]      |
| Fc-PP-POP        | 99.31%       | 600 min                       | 100%                         | [S6]      |
| TAPB-BPDA<br>COF | 92%          | 60 min                        | 88%                          | [S7]      |
| TPE-CD-COPR      | 100%         | 60 min                        | 99%                          | This work |

## Section 9. Supporting References

- [1] X. Guo, J. Yu, L. Ma, J. Yuan, T. Guo, Y. Ma, S. Xiao, J. Bai B. Zhou, Covalent organic polyrotaxanes based on  $\beta$ -cyclodextrin for iodine capture, *RSC Adv.*, 2024, 14, 30077-30083.
- [2] J. X. Wang, H. R. Shu, K. Guo, X. Wang and S. Zhang, Porous  $\beta$ -cyclodextrin polymer microspheres for iodine adsorption from aqueous solution, *J. Mater. Sci.*, 2024, 59, 3327-3338.
- [3] T. Guo, Y. Wang, J. Li, X. Ding, Q. Sun, J. Yuan, L. Ma, H. Hao and B. Zhou, Porous Organic Polymers with Embedded  $\text{Fe}_2\text{O}_3$  Nanoparticles for Pathogenic Microorganism Inactivation and Iodine Removal from Nuclear Water, *ACS Appl. Nano Mater.*, 2024, 7, 17391-17405.
- [4] J. Yuan, J. Yu, L. Ma, Y. Ma, H. Hao, C. Zhao and B. Zhou, Michael addition-elimination reaction derived covalent organic polyrotaxane xerogels for ultra-high-efficiency capture of iodine pollutants, *J. Environ. Chem. Eng.*, 2024, 12, 114531.
- [5] C. Miao, N. Tang, L. Shi, S. Wang, P. Ji, J. Zhang, Z. Wang and B. Zhou, Ionic functionalized magnetic porous polymers as advanced materials for high-efficiency water decontamination: bactericidal and iodine adsorption, *ACS Appl. Polym. Mater.*, 2023, 5, 8679-8692.
- [6] C. Miao, L. Chu, D. Guo, X. Ding, W. Guo, S. Wang, J. Sheng, J. Zhang, Z. Wang and B. Zhou, Ferrocene-based porous polymer as advanced environmental remediation material for self-enhanced synergetic photothermal-enzymatic antibacterial and reversible iodine capture, *J. Environ. Chem. Eng.*, 2023, 11, 110514.
- [7] R. Chen, T. Hu and Y. Li, Stable nitrogen-containing covalent organic framework as porous adsorbent for effective iodine capture from water, *React. Funct. Polym.*, 2021, 159, 104806.
